# Supplementary material for: Characterization of β-turns by electronic circular dichroism spectroscopy: a coupled molecular dynamics and time-dependent density functional theory computational study
Source: Royal Society of Chemistry journal article supplement (doi:10.1039/c9cp05776e), 2020-01-01

**Characterization of  $\beta$ -turns by electronic circular dichroism spectroscopy:  
A coupled molecular dynamics and time-dependent density functional theory  
computational study**

Mattia MIGLIORE, Andrea BONVICINI, Vincent TOGNETTI, Laure GUILHAUDIS, Marc  
BAADEN, Hassan OULYADI, Laurent JOUBERT, Isabelle SEGALAS-MILAZZO

***Supplementary information file***

## Contents

|                                                                                                                                                    |     |
|----------------------------------------------------------------------------------------------------------------------------------------------------|-----|
| <b>Figure S1.</b> Dihedral angles distributions for Ace-A-A-NHMe: type I $\beta$ -turn .....                                                       | S3  |
| <b>Figure S2.</b> Dihedral angles distributions for Ace-A-A-NHMe: type I' $\beta$ -turn .....                                                      | S4  |
| <b>Figure S3.</b> Dihedral angles distributions for Ace-A-A-NHMe: type II $\beta$ -turn .....                                                      | S5  |
| <b>Figure S4.</b> Dihedral angles distributions for Ace-A-A-NHMe: type II' $\beta$ -turn .....                                                     | S6  |
| <b>Figure S5.</b> Dihedral angles distributions for type I Ace-K-A-NHMe with only one Cl <sup>-</sup><br>and in a 150 mM NaCl solution.....        | S7  |
| <b>Figure S6.</b> Averaged absorption spectra for Ace-A-A-NHMe for the four $\beta$ -turns types..                                                 | S8  |
| <b>Figure S7.</b> $\kappa$ distributions for the four considered $\beta$ -turn types.....                                                          | S9  |
| <b>Figure S8.</b> $\Delta\lambda$ distributions for the four considered $\beta$ -turn types.....                                                   | S10 |
| <b>Figure S9.</b> Comparison between averaged ECD spectra computed from MD simulations<br>using different force fields (OPLS-AA and CHARMM27)..... | S11 |
| <b>Figure S10.</b> Averaged ECD spectra for $\beta$ -turn type I computed with and without the<br>PE-EEF extension .....                           | S12 |

**Figure S1.** Dihedral angles (in  $^{\circ}$ ) distributions (in %) for Ace-A-A-NHMe in type I  $\beta$ -turn conformation.

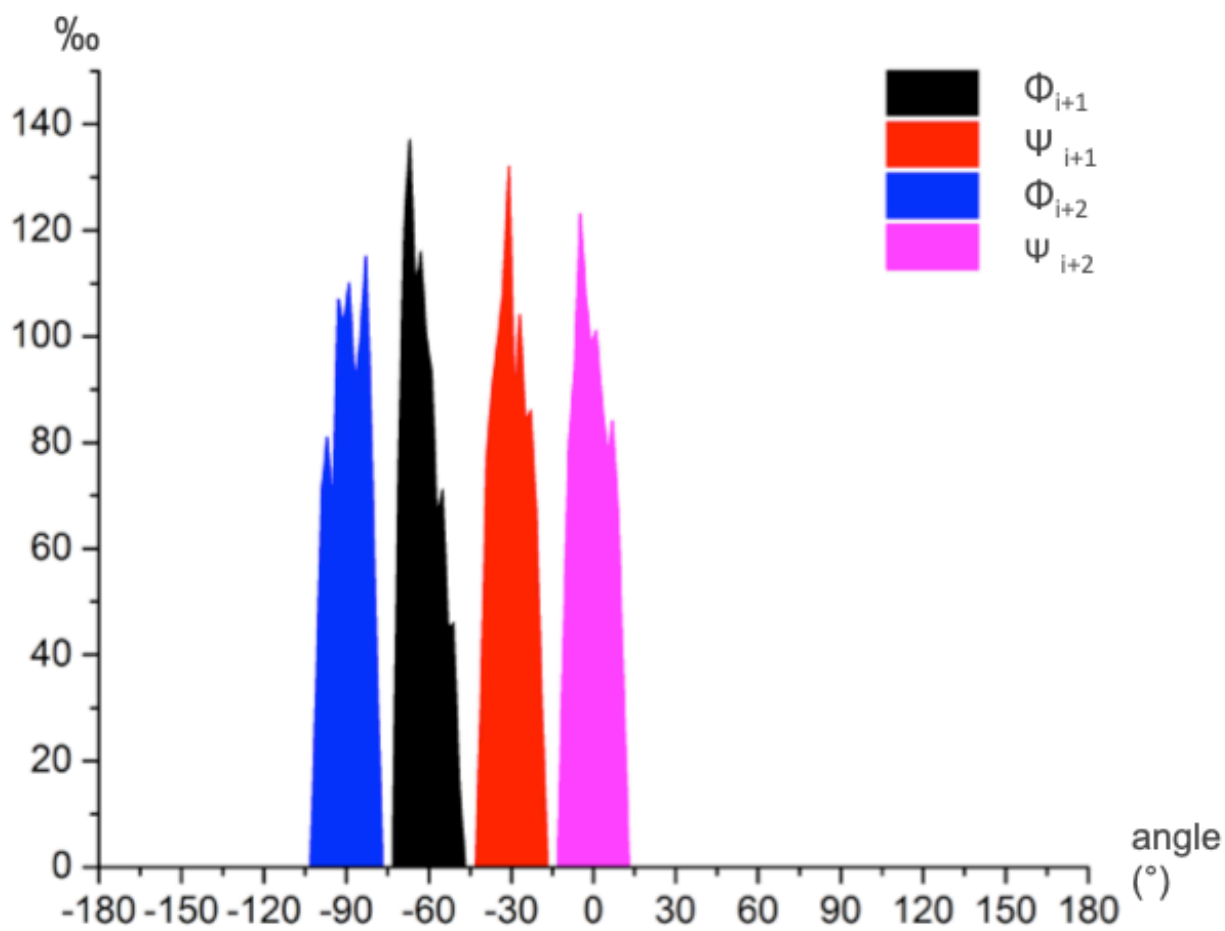

**Figure S2.** Dihedral angles (in °) distributions (in %) for Ace-A-A-NHMe in type I'  $\beta$ -turn conformation.

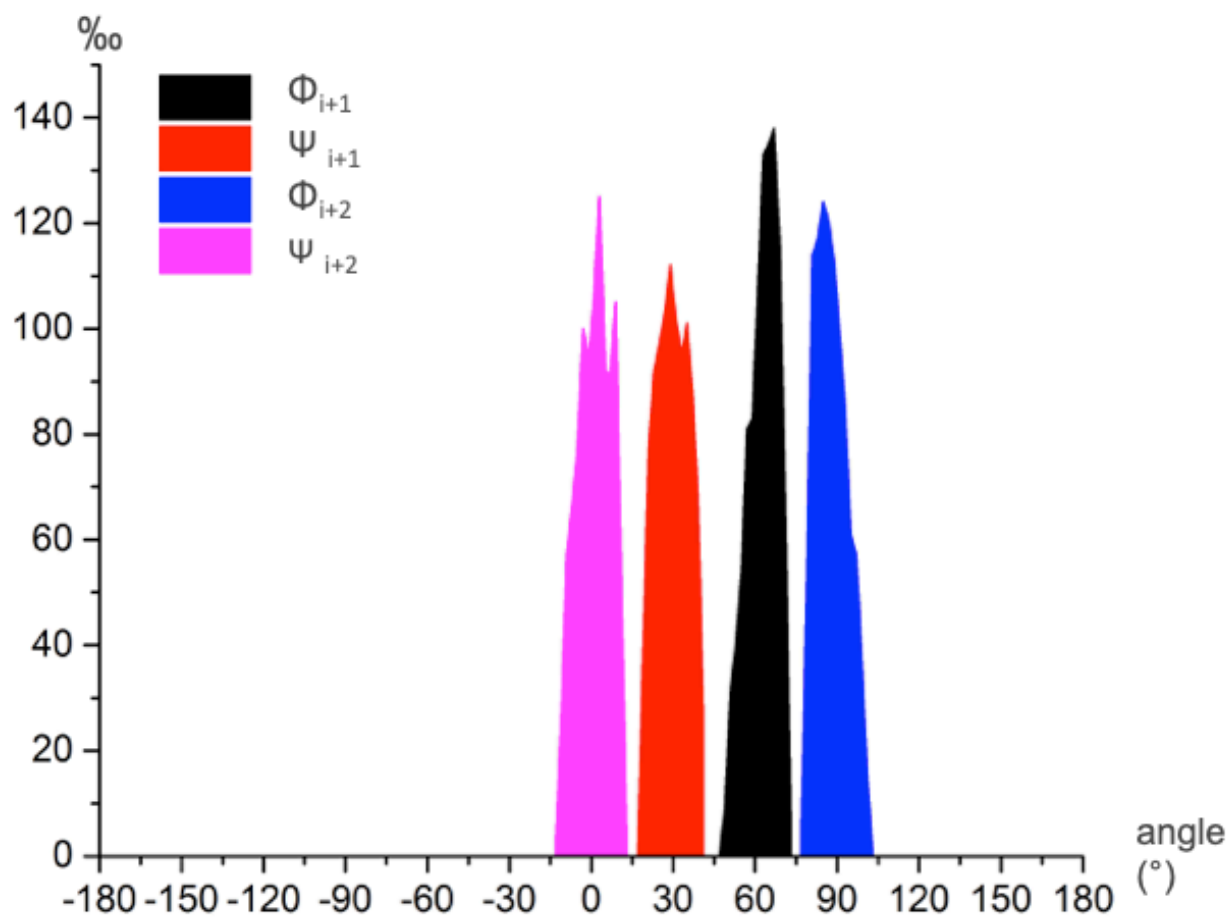

**Figure S3.** Dihedral angles (in  $^{\circ}$ ) distributions (in %) for Ace-A-A-NHMe in type II  $\beta$ -turn conformation.

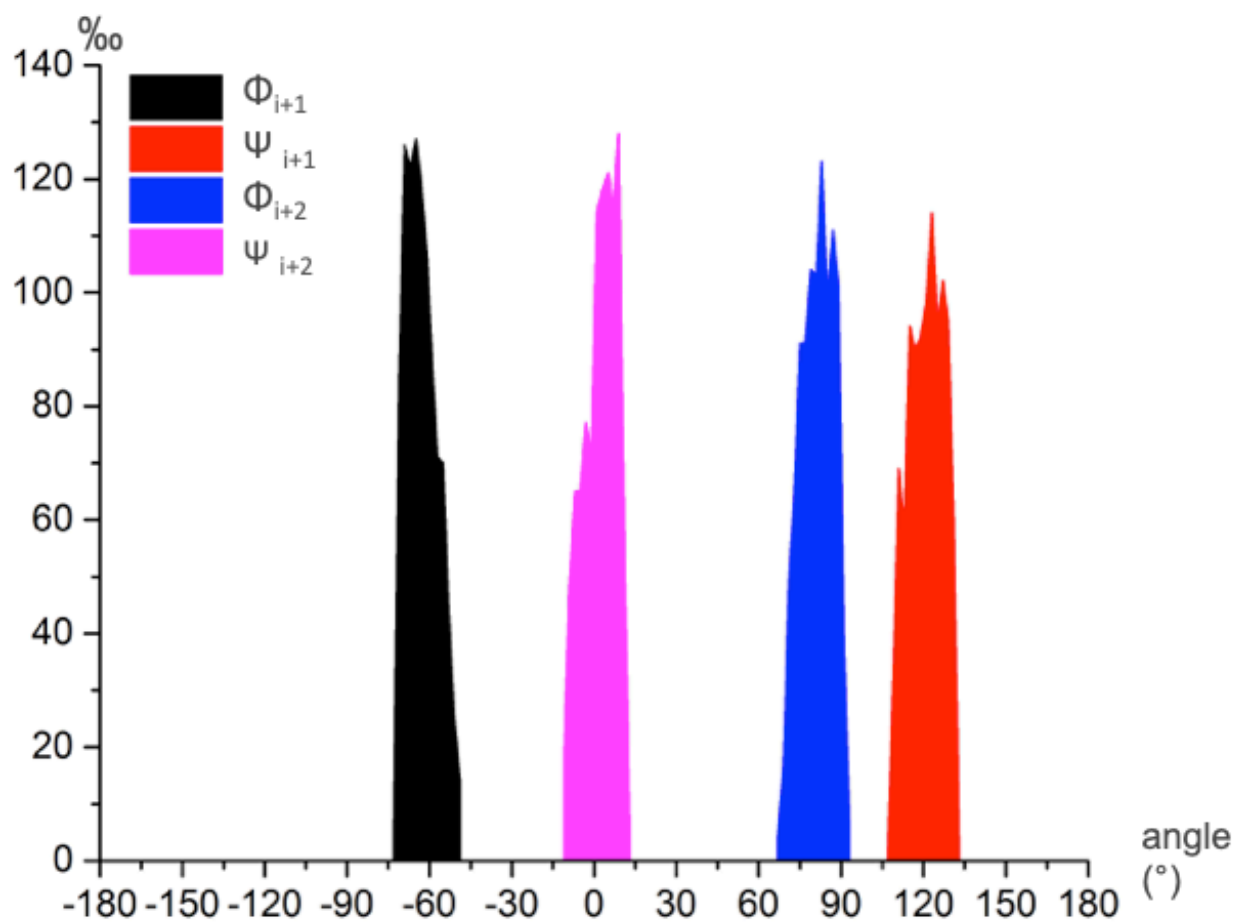

**Figure S4.** Dihedral angles (in  $^{\circ}$ ) distributions (in %) for Ace-A-A-NHMe in type II'  $\beta$ -turn conformation.

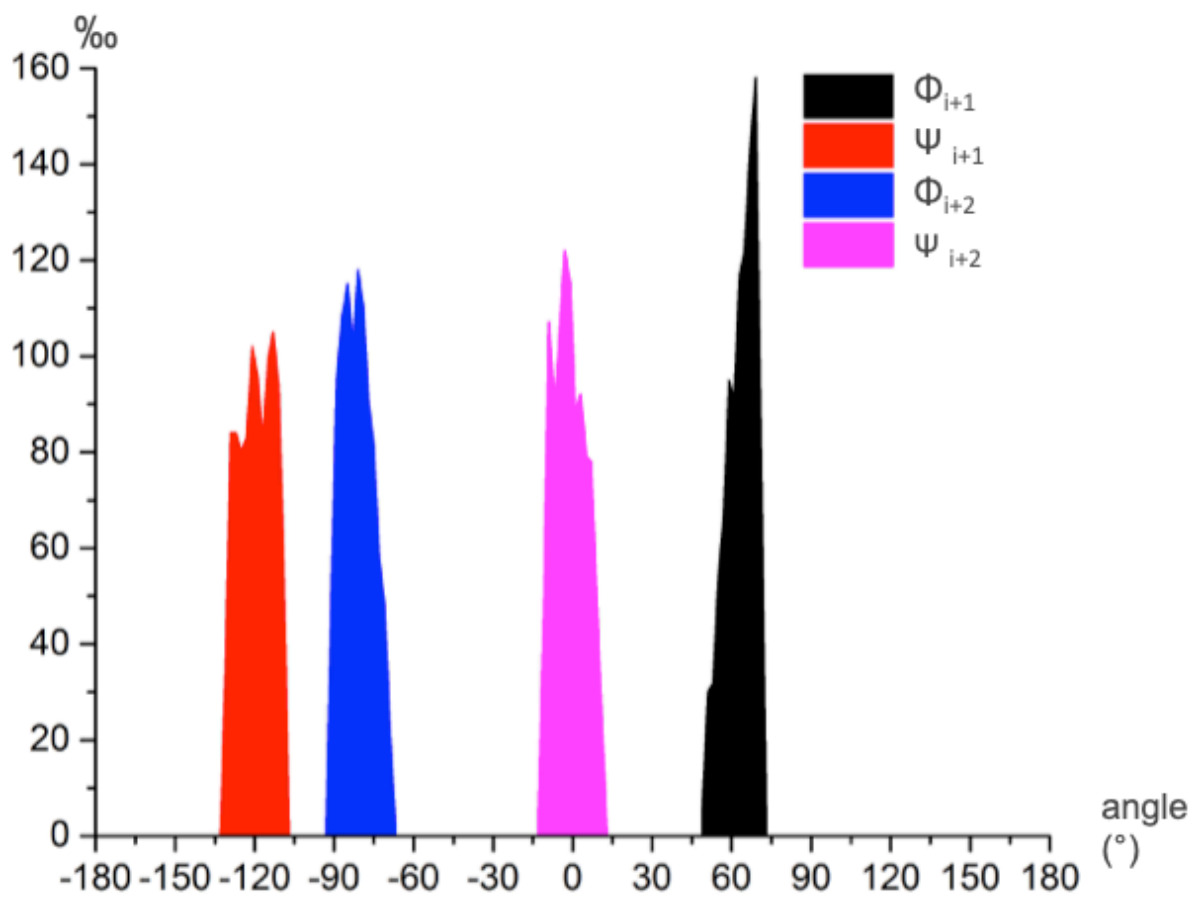

**Figure S5.** Dihedral angles (in  $^{\circ}$ ) distributions (in %) for Ace-K-A-NHMe in type I  $\beta$ -turn conformation with only one  $\text{Cl}^-$  as counteranion (in black) and in a 150 mM NaCl solution (in red).

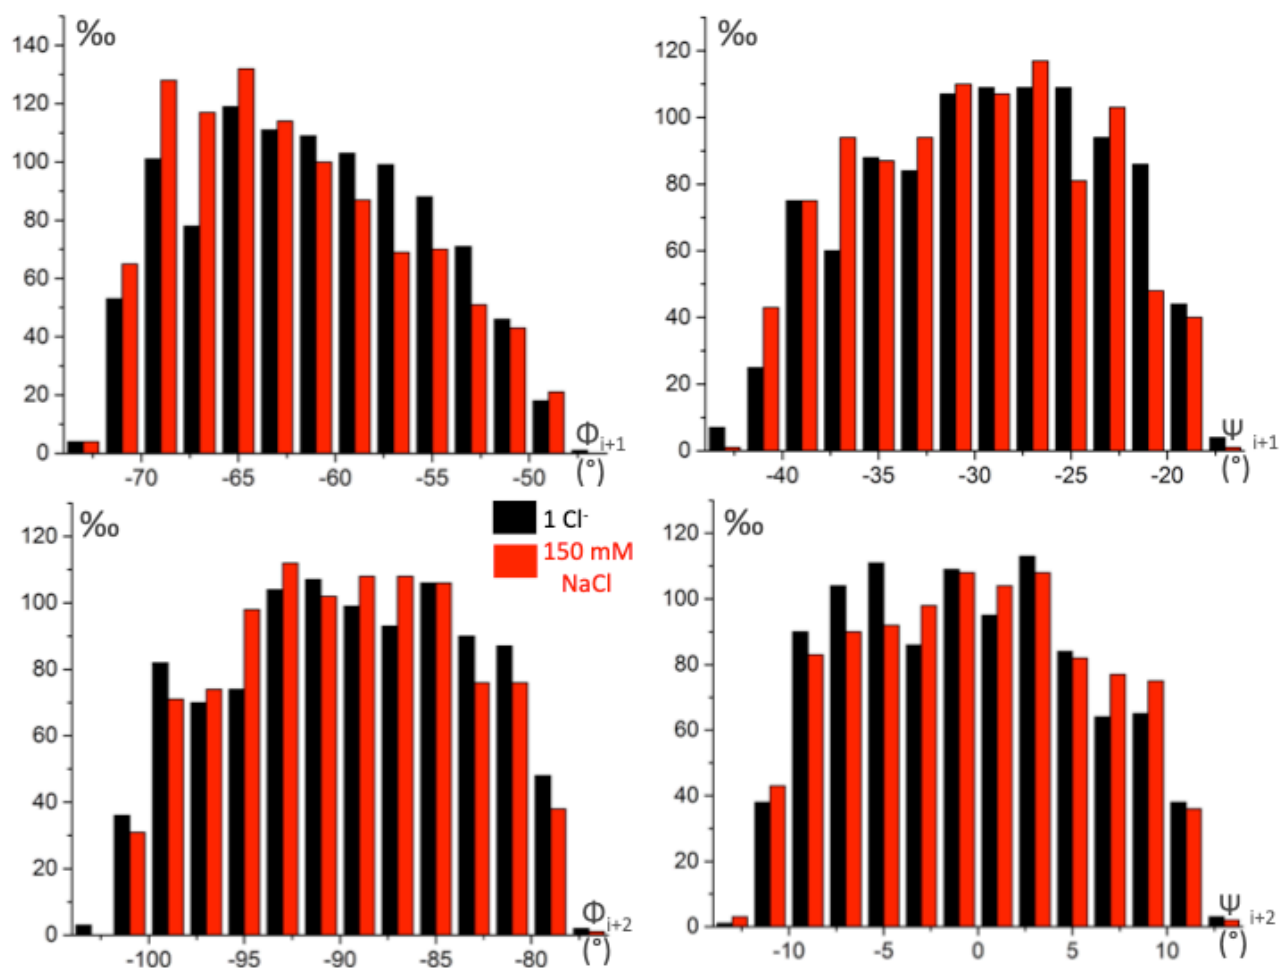

**Figure S6.** Averaged absorption spectra for Ace-A-A-NHMe for the four  $\beta$ -turns types considered here.

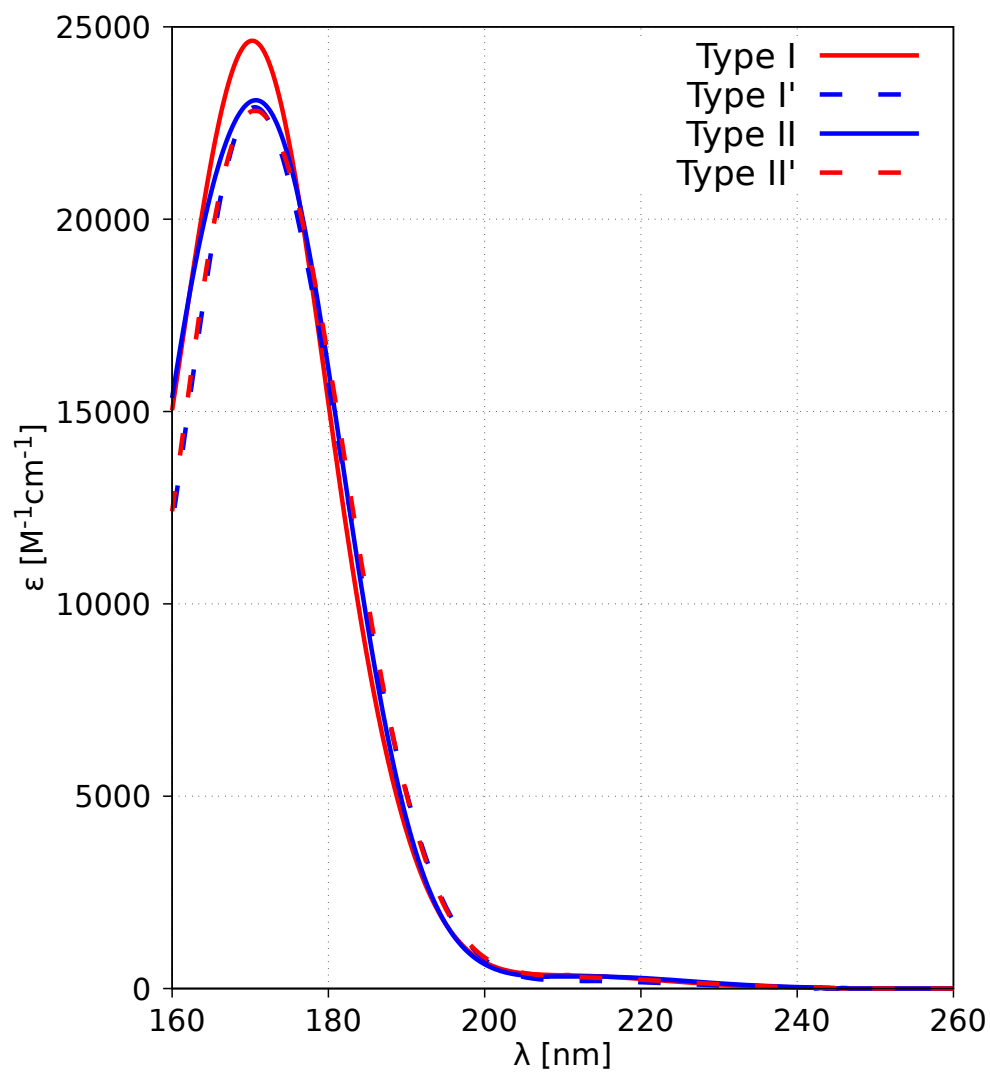



**Figure S7.** Distributions (in %) for the intensity ratio between the negative and positive ECD bands,  $\kappa$  (see eq. 5 in the paper) for the four considered  $\beta$ -turn types.

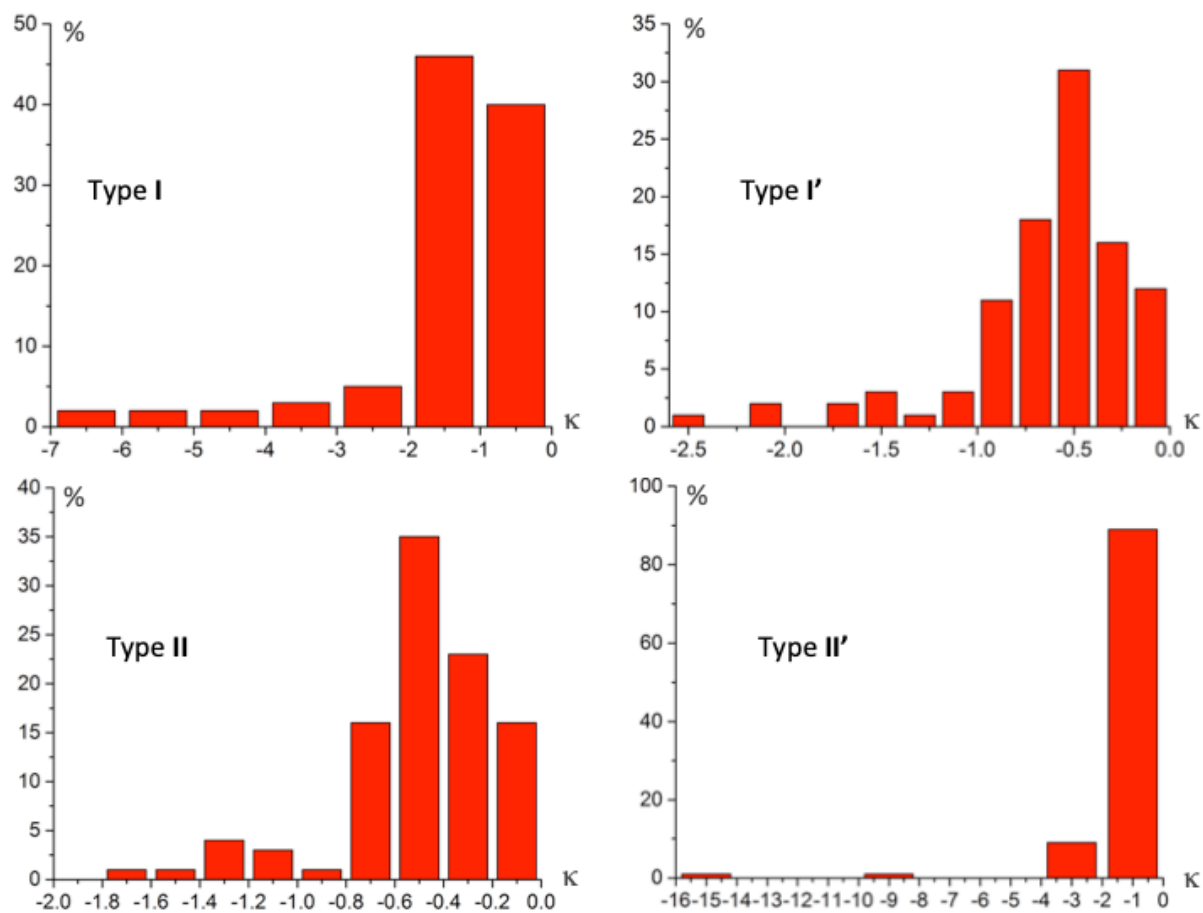

**Figure S8.** Distributions (in %) for the wavelength difference between the negative and positive ECD bands,  $\Delta\lambda$  (in nm, see eq. 4 in the paper) for the four considered  $\beta$ -turn types.

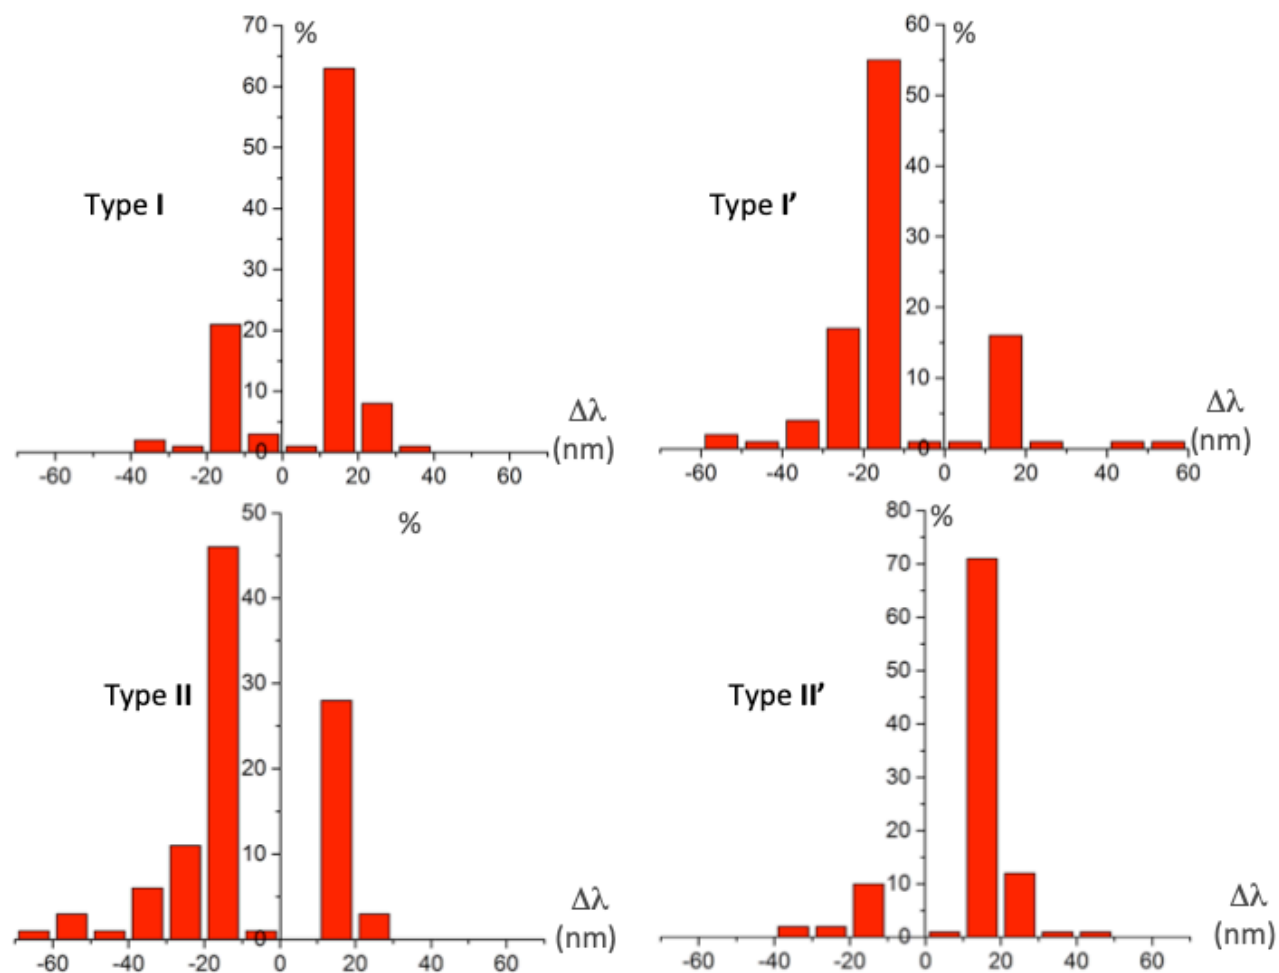

**Figure S9.** Comparison of averaged ECD spectra for the minimal model Ace-A-A-NHMe for the  $\beta$ -I turn conformation obtained from a restrained MD simulation (with allowed deviations of  $\pm 10^\circ$  around the canonical  $\Phi_{i+1}$ ,  $\Psi_{i+1}$ ,  $\Phi_{i+2}$  and  $\Psi_{i+2}$  dihedral angles) using either the OPLS-AA or the CHARMM27 force fields.

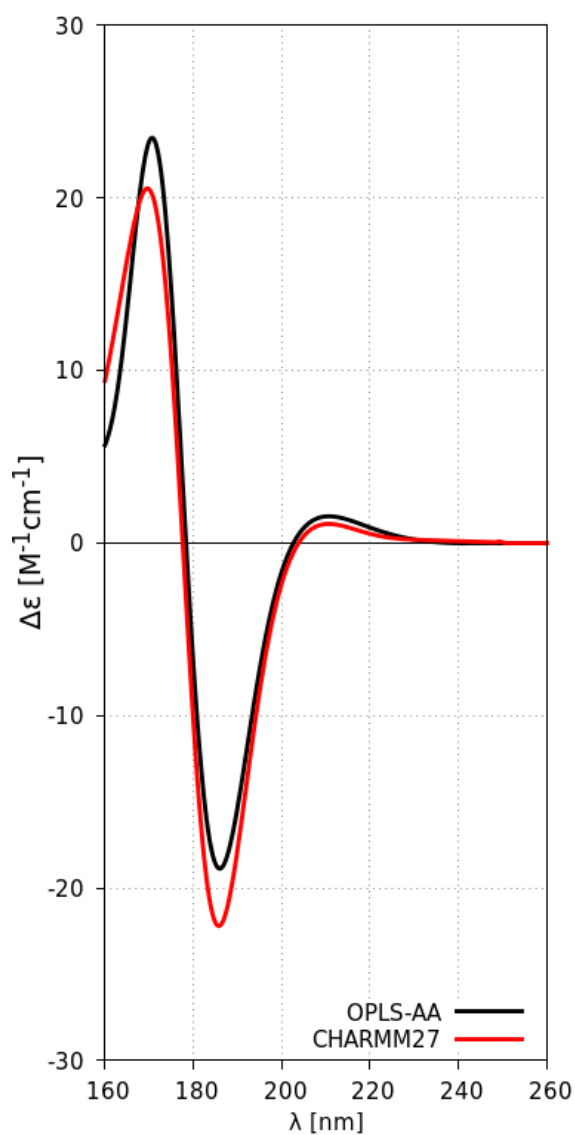

**Figure S10.** Averaged ECD spectra for  $\beta$ -turn type I computed with (using the RESPONSE module) and without (using the PROPERTIES module) the PE-EEF extension.

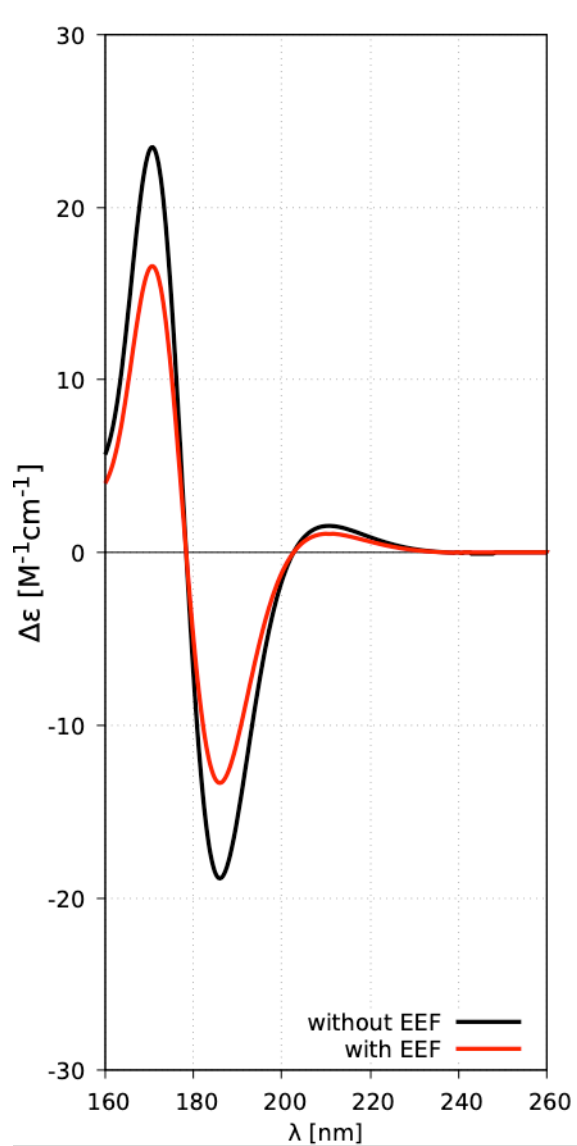

Supplement: c9cp05776e1.pdf [file c9cp05776e1.pdf]
